# Supplementary material
Source: PubMed Central journal article supplement (PMC5912464)
Supplement: 10.1074_M117.809228_jbc.M117.809228-1.pdf [file 10.1074_M117.809228_jbc.M117.809228-1.pdf]

**Signaling between pancreatic  $\beta$ -cells and macrophages via S100 calcium-binding protein A8  
exacerbates  $\beta$ -cell apoptosis and islet inflammation**

Hideaki Inoue, Jun Shirakawa\*, Yu Togashi, Kazuki Tajima, Tomoko Okuyama, Mayu Kyohara,  
Yui Tanaka, Kazuki Orime, Yoshifumi Saisho, Taketo Yamada, Kimitaka Shibue,  
Rohit N. Kulkarni, and Yasuo Terauchi

**Supporting information**

## Supplemental Tables

**Supplemental Table S1. Body weight and blood glucose levels of the db/db mice.**

12 weeks of age

|              | <b>Body weight (g)</b> | <b>Blood glucose (mM)</b> |
|--------------|------------------------|---------------------------|
| <b>db/+</b>  | 29.6 ± 0.51            | 8.30 ± 0.46               |
| <b>db/db</b> | 48.3 ± 0.25            | 27.96 ± 3.62              |

6 weeks of age

|              | <b>Body weight (g)</b> | <b>Blood glucose (mM)</b> |
|--------------|------------------------|---------------------------|
| <b>db/+</b>  | 25.95 ± 0.55           | 7.42 ± 0.58               |
| <b>db/db</b> | 32.00 ± 0.60           | 13.00 ± 4.11              |

Data are shown as mean ±SE

**Supplemental Table S2. TaqMan probes and primer for the real-time PCR.**

| Gene Symbol          | TaqMan Assay ID<br>(mouse) | Gene Symbol          | Primers                                                                        |
|----------------------|----------------------------|----------------------|--------------------------------------------------------------------------------|
| Actb                 | Mm02619580_g1              | Actb<br>(mouse)      | Forward: GGCTGTATTCCCCTCCATCG<br>Reverse: CCAGTTGGTAACAATGCCATGT               |
| Rn18s                | Mm03928990_g1              | S100a8<br>(mouse)    | Forward: AAATCACCATGCCCTCTACAAG<br>Reverse: CCCACTTTTATCACCATCGCAA             |
| S100a8               | Mm00496696_g1              | S100a9<br>(mouse)    | Forward: ATACTCTAGGAAGGAAGGACACC<br>Reverse: TCCATGATGTCATTTATGAGGGC           |
| S100a9               | Mm00656925_m1              | Tnf-alpha<br>(mouse) | Forward: CCCTCACACTCAGATCATCTTCT<br>Reverse: GCTACGACGTGGGCTACAG               |
| Tnf-alpha            | Mm00443258_m1              | Ccl2<br>(mouse)      | Forward: TTAAAAACCTGGATCGGAACCAA<br>Reverse: GCATTAGCTTCAGATTTACGGGT           |
| Il1b                 | Mm00434228_m1              | Il1b<br>(mouse)      | Forward: GGGCCTCAAAGGAAAGAATC<br>Reverse: TTGCTTGGGATCCACACTCT                 |
| Il6                  | Mm00446190_m1              | Il6<br>(mouse)       | Forward: TAGTCCTTCTACCCCAATTTCC<br>Reverse: TTGGTCCTTAGCCACTCCTTC              |
| Ccl2                 | Mm00441242_m1              | Il12<br>(mouse)      | Forward: TGGTTTGCCATCGTTTTGCTG<br>Reverse: ACAGGTGAGGTTCACTGTTTCT              |
| F4/80                | Mm00802529_m1              | Il22<br>(mouse)      | Forward: ATGAGTTTTTCCCTTATGGGGAC<br>Reverse: GCTGGAAGTTGGACACCTCAA             |
| Cd11b                | Mm00434455_m1              | Il23<br>(mouse)      | Forward: ATGCTGGATTGCAGAGCAGTA<br>Reverse: ACGGGGCACATTATTTTTAGTCT             |
| Selp<br>(p-selectin) | Mm00441295_m1              | Il24<br>(mouse)      | Forward: CTGCCTGAGCCTAATCCTTCT<br>Reverse: CTTGGCAAGACCCAAATCGGA               |
|                      |                            | Ap2<br>(mouse)       | Forward: GCGTGGAATTCGATGAAATCA<br>Reverse: CCCGCCATCTAGGGTTATGA                |
|                      |                            | Cd11b<br>(mouse)     | Forward: ATGGACGCTGATGGCAATACC<br>Reverse: TCCCCATTACGTCTCCA                   |
|                      |                            | F4/80<br>(mouse)     | Forward: CTTTGGCTATGGGCTTCCAGTC<br>Reverse: GCAAGGAGGACAGAGTTTATCGTG           |
|                      |                            | GAPDH<br>(human)     | Forward: AGGGCTGCTTTTAACTCTGGT<br>Reverse: CCCCACTTGATTTTGGAGGGA               |
|                      |                            | S100A8<br>(human)    | Forward: CTCAGTATATCAGGAAAAAGGGTGCAGAC<br>Reverse: CACGCCCATCTTTATCACCAGAATGAG |

**Supplemental Table S3. Characteristics of islet donors (Fig. 10A, 10B, 10C, and 10D).**

| <b>Donor UNOS ID</b> | <b>Gender</b> | <b>Ethnicity/Race</b>     | <b>Age (years)</b> | <b>BMI</b> | <b>Diabetic donor status</b> | <b>Islet purity (%)</b> | <b>Islet viability (%)</b> |
|----------------------|---------------|---------------------------|--------------------|------------|------------------------------|-------------------------|----------------------------|
| ADH5380              | Male          | Hispanic/Latino           | 59                 | 28.3       | No                           | 75                      | 90                         |
| ADIE157              | Male          | White                     | 56                 | 40.1       | No                           | 95                      | 95                         |
| ACAF123A             | Female        | White                     | 36                 | 42.7       | No                           | 85                      | 99                         |
| ADK2286              | Female        | Black or African American | 49                 | 25.2       | No                           | 95                      | 90                         |
| ABLM454              | Male          | White                     | 40                 | 36.5       | No                           | 93                      | 80                         |
| ADJQ078              | Male          | White                     | 45                 | 24.6       | No                           | 90                      | 90                         |
| AELM182              | Male          | White                     | 64                 | 34.5       | No                           | 80                      | 97                         |
| AELO080              | Female        | White                     | 53                 | 27.6       | No                           | 80                      | 95                         |
| AFAE017A             | Male          | White                     | 32                 | 26.2       | No                           | 85                      | 98                         |
